1 **Variation in Aerosol Production Across Oxygen Delivery Devices in**  
2 **Spontaneously Breathing Human Subjects**

3  
4 Theodore J. Iwashyna, MD, PhD /1,2/

5 Andre Boehman, PhD /3/

6 Jesse Capecehatro, PhD /3/

7 Amy M. Cohn, PhD /4/

8 James M. Cooke, MD /5,6/

9 Deena Kelly Costa, PhD, RN /7/

10 Richard M. Eakin, RT, *RRT-ACCS* /8/

11 Hallie C. Prescott /1,2/

12 Margaret S. Woolridge, PhD /3,9/

13  
14 1/ VA Center for Clinical Management Research

Ann Arbor Veteran Affairs Health System, Ann Arbor, Michigan, USA

16  
17 2/ Medicine

18 3/ Mechanical Engineering

19 4/ Industrial & Operations Engineering

20 5/ Family Medicine

21 6/ Learning Health Sciences

22 7/ Nursing

23 8/ Respiratory Care

24 9/ Aerospace Engineering

25  
26 at the University of Michigan, Ann Arbor, Michigan, USA

27  
28 Acknowledgements: We would like to thank Gene Kim and Lee Kamphuis for their  
29 administrative support.

30  
31 Funding: None. This material is the result of work supported with resources and use of  
32 facilities at the Ann Arbor VA Medical Center.

33  
34 Disclaimer: This work does not necessarily represent the views of the US Government  
35 or Department of Veterans Affairs.

36  
37 Word Count 1261

38  
39 Corresponding Author

40 Theodore J Iwashyna, MD, PhD

41 2800 Plymouth Road

42 NCRC Building 16, Room 326W

43 Ann Arbor, MI. 48109

44 Email: [tiwashyn@umich.edu](mailto:tiwashyn@umich.edu)

45 Twitter: [@iwashyna](https://twitter.com/iwashyna)

46 Heated high-flow nasal cannula (HHFNC) has emerged as an important life support tool  
47 for patients with acute hypoxemic respiratory failure, especially for patients in whom  
48 intubation may be riskier or incompatible with their goals of care. It may also have an  
49 important role in facilitating extubation.<sup>1,2</sup>

50  
51 Despite the central importance of hypoxemic respiratory failure as a mechanism of  
52 mortality in COVID19, several authorities have recommended against the use of heated  
53 high-flow nasal cannula in patients with suspected or confirmed COVID19.<sup>3-5</sup> These  
54 recommendations are driven in part by data of dispersion and stability of SARS-CoV-2  
55 in clinical spaces<sup>6-8</sup>, and fears that high flow rates will increase aerosolization of SARS-  
56 CoV-2, including by data from an artificial simulator using a smoke dispersion model.<sup>9,10</sup>  
57 In contrast, lower flow oxygen is routinely assumed to present an acceptable risk of  
58 aerosol dispersion. Therefore, in order to inform care policy for COVID19 patients at the  
59 VA Ann Arbor and University of Michigan regarding infection control under oxygen  
60 support, we sought to assess whether HHFNC results in greater production of  
61 aerosolized particles than 6 liters per minute nasal cannula, using state-of-the-art  
62 techniques of aerosol measurement, in spontaneously breathing human volunteers in a  
63 simulated hospital room.

## 64 65 **Methods**

66  
67 This work was conducted as a quality improvement project in order to inform care policy  
68 for COVID19 patients at the VA Ann Arbor and University of Michigan regarding  
69 infection control under oxygen support, and reviewed and deemed not regulated by the  
70 University of Michigan Institutional Review Board (HUM00179622).

71  
72 For each volunteer, we first measured background aerosol levels in the room  
73 immediately prior to testing. We then measured aerosol levels while the healthy  
74 volunteer laid in bed—with the head of bed at 30 degrees—wearing the following  
75 oxygen delivery devices: (a) 6L/min nasal canula (NC) with humidification; (b) non-re-  
76 breather mask (NRB) with 15L/min gas flow, non-humidified; (c) HHFNC with 30L/min  
77 gas flow; (d) HHFNC with 60L/min gas flow. Two scanning mobility particle sizing  
78 (SMPS) systems (TSI 3080/3030, TSI 3080/3750) were used to measure aerosols 10 to  
79 500 nanometer (nm) in size for each of the oxygen delivery devices. Additional  
80 measurements were made during HHFNC use for larger particles (from 10 to 10,000 nm  
81 in size) using two particles counters (PCs; TSI 3030, TSI 3330). For reference, testing  
82 was performed with a low aerosolization control (HEPA filter) and 2 high aerosolization  
83 controls (with a candle burning, and with a water nebulizer).

84  
85 The SMPS aerosol measurement probes were placed in two locations (**Figure 1**)  
86 selected for their clinical relevance: (#1) affixed to the bed rail beside the patient's head  
87 (mimicking where someone would stand to perform suctioning or oral care). The probe  
88 at location #1 was also relocated to a second position (#2) to approximately 10 cm from  
89 the patient's mouth for each oxygen delivery device test. The particle counters  
90 measurements were made at position (#2).

91

92 Aerosol measurements were obtained using the SMPS and PC systems, which reliably  
93 assess the distribution of particles of size 10 to 10,000 nm, the relevant range for  
94 human coughing.<sup>11</sup>

95  
96 Each sample was collected for three minutes and data were acquired for approximately  
97 a 10-minute period for each oxygen delivery device. The healthy volunteers were  
98 instructed to intentionally cough at each setting; spontaneous coughing occurred for  
99 some volunteers throughout and was not suppressed in any way. The simulated  
100 hospital room matched the dimensions, shape and layout of a single occupancy hospital  
101 room with all equipment, monitors and computers standard to this setting. Standard wall  
102 gas supplies and regulators were used with compressed air substituted for  
103 supplemental oxygen. Investigators wore standard surgical face masks and remained in  
104 the room and stationary for each extended sampling period to minimize air disturbance.  
105 We recorded each sampling period (video and audio) for reference and data archiving.

## 106 107 **Data Analysis**

108  
109 For each aerosol sample, the particle size distribution, the total number of particles, the  
110 total mass of particles and the average particle size were measured

## 111 112 **Results**

113  
114 Four healthy volunteers from the authorship group participated, 2 male (Patients 1 and  
115 2) and 2 female (Patients 3 and 4). None had known lung disease, recent exposure to  
116 COVID-19 or other sick contacts, or recent travel to a known area of transmission. No  
117 testing occurred with the volunteers wearing masks.

118  
119 **Figure 2** shows particle mass concentrations among the first 3 patients; note the log  
120 vertical scale. As seen in the figure, there was variation in baseline measurements (i.e.,  
121 room air) day-to-day. Samples of the room air are included for reference in **Figure 2** at  
122 measurement location #1, the head of the bed. (Patients 1 and 2 were done on one day,  
123 Patient 3 on another.) As seen in the bottom center of the figure, HEPA filtration caused  
124 an order of magnitude decrease in particle concentrations, and the burning of a candle  
125 caused an order of magnitude increase in particle concentrations. Similar increases  
126 were seen with the nebulizer (data not shown). There was no variation in aerosol level  
127 within patients between room air, 6 L/min NC, 15 L/min NRB, 30 L/min HHFNC, and 60  
128 L/min HHFNC, regardless of coughing. Consistent results are shown in **Figure 3** for the  
129 particle number concentration (via SMPS), and in **Figure 4** for average particle diameter  
130 (via SMPS).

131  
132 Measurements with the Patients 1, 3, and 4, that included broader range of particles, up  
133 to 10,000 nm (=10 micron), also showed consistently no increase above the room levels  
134 of particle number concentration during HHFNC use at 30 L/min or 60 L/min (**Appendix**  
135 **1**). (These tests were repeated for Patients 1, 3, and 4 on a third testing day with the  
136 particle counters at position #2 in **Figure 1**.)

137

138  
139  
140  
141  
142  
143  
144  
145  
146  
147  
148  
149  
150  
151  
152  
153  
154  
155  
156  
157  
158  
159  
160  
161  
162  
163  
164  
165  
166

## Conclusion

In these healthy human volunteers, there was no evidence of increased aerosolization with nasal cannula, non-rebreather mask, or heated high flow nasal cannula in the particle size range of 10 nm to 10000 nm. This may contrast with the interpretation of another study that used mannequins and an intentional addition of smoke to their model of the right middle lobe of the lung as a measure, although the actual dispersion distances shown in that study are similar.<sup>9</sup> In contrast, Loh *et al* reported visible assessments of gargled food dye in each of 5 patients who coughed twice, which showed highly variable changes in coughing distance from a reduction of 2 cm to an increase fo 84 cm using HHFNC compared to spontaneous breathing.<sup>12</sup> Our data are consistent with Leung *et al*'s culture-based data showing no increased dispersion in infectious organisms with the use of HHFNC in ICU patients with pneumonia.<sup>13</sup>

A limitation of the present study is the modest numbers of volunteers, with consequent limitations in the degree of variation in naso/oral structures. None of these human subjects had an active viral syndrome—although also neither did any of the test mannequins in prior data. These data do not speak to the aerosolization potential of other modalities, nor to debates about the relative merits of early intubation and volume limitation versus spontaneous breathing with heated high flow nasal cannula in the acute respiratory distress syndrome. Debate about the correct biophysical conceptualization of droplet spread remains.<sup>14</sup> Despite these limitations, these data doprovide direct evidence that there may be limited differences in aerosolization between alternative modes of oxygen delivery at clinically relevant distances and positions for routine care.

Preprint

167 **References**

- 168
- 169 1. Hernandez G, Vaquero C, Colinas L, et al. Effect of Postextubation High-Flow  
170 Nasal Cannula vs Noninvasive Ventilation on Reintubation and Postextubation  
171 Respiratory Failure in High-Risk Patients: A Randomized Clinical Trial. *JAMA*.  
172 2016;316(15):1565-1574.
  - 173 2. Hernandez G, Vaquero C, Gonzalez P, et al. Effect of Postextubation High-Flow  
174 Nasal Cannula vs Conventional Oxygen Therapy on Reintubation in Low-Risk  
175 Patients: A Randomized Clinical Trial. *JAMA*. 2016;315(13):1354-1361.
  - 176 3. Wax RS, Christian MD. Practical recommendations for critical care and  
177 anesthesiology teams caring for novel coronavirus (2019-nCoV) patients. *Can J*  
178 *Anaesth*. 2020.
  - 179 4. Department of Veterans Affairs (VA) Veterans Health Administration (VHA).  
180 *STANDARD OPERATING PROCEDURE (SOP): Interim Guidance for Medical*  
181 *Management of Hospitalized COVID-19 Patients, March 21, 2020*. 2020.
  - 182 5. Respiratory Therapy Group of the Chinese Medical Association Respiratory  
183 Branch. Expert Consensus on Respiratory Therapy Related to New Coronavirus  
184 Infection in Severe and Critical Patients. *Chinese Journal of Tuberculosis and*  
185 *Respiratory Medicine*. 2020;17:eRelease ahead of print.
  - 186 6. Guo ZD, Wang ZY, Zhang SF, et al. Aerosol and Surface Distribution of Severe  
187 Acute Respiratory Syndrome Coronavirus 2 in Hospital Wards, Wuhan, China,  
188 2020. *Emerg Infect Dis*. 2020;26(7).
  - 189 7. van Doremalen N, Bushmaker T, Morris DH, et al. Aerosol and Surface Stability  
190 of SARS-CoV-2 as Compared with SARS-CoV-1. *N Engl J Med*. 2020.
  - 191 8. Kampf G, Todt D, Pfaender S, Steinmann E. Persistence of coronaviruses on  
192 inanimate surfaces and their inactivation with biocidal agents. *J Hosp Infect*.  
193 2020;104(3):246-251.
  - 194 9. Hui DS, Chow BK, Lo T, et al. Exhaled air dispersion during high-flow nasal  
195 cannula therapy versus CPAP via different masks. *The European respiratory*  
196 *journal*. 2019;53(4).
  - 197 10. Namendys-Silva SA. Respiratory support for patients with COVID-19 infection.  
198 *The Lancet Respiratory medicine*. 2020.
  - 199 11. Zayas G, Chiang MC, Wong E, et al. Cough aerosol in healthy participants:  
200 fundamental knowledge to optimize droplet-spread infectious respiratory disease  
201 management. *BMC Pulm Med*. 2012;12:11.
  - 202 12. Loh NW, Tan Y, Taculod J, et al. The impact of high-flow nasal cannula (HFNC)  
203 on coughing distance: implications on its use during the novel coronavirus  
204 disease outbreak. *Can J Anaesth*. 2020.
  - 205 13. Leung CCH, Joynt GM, Gomersall CD, et al. Comparison of high-flow nasal  
206 cannula versus oxygen face mask for environmental bacterial contamination in  
207 critically ill pneumonia patients: a randomized controlled crossover trial. *J Hosp*  
208 *Infect*. 2019;101(1):84-87.
  - 209 14. Bourouiba L. Turbulent Gas Clouds and Respiratory Pathogen Emissions:  
210 Potential Implications for Reducing Transmission of COVID-19. *JAMA*. 2020.
- 211
- 212

213  
214  
215  
216  
217  
218

**Figure 1: Examples of measurement location and test set-up.** All photographed individuals are named authors on the manuscript and this is used with their permission.

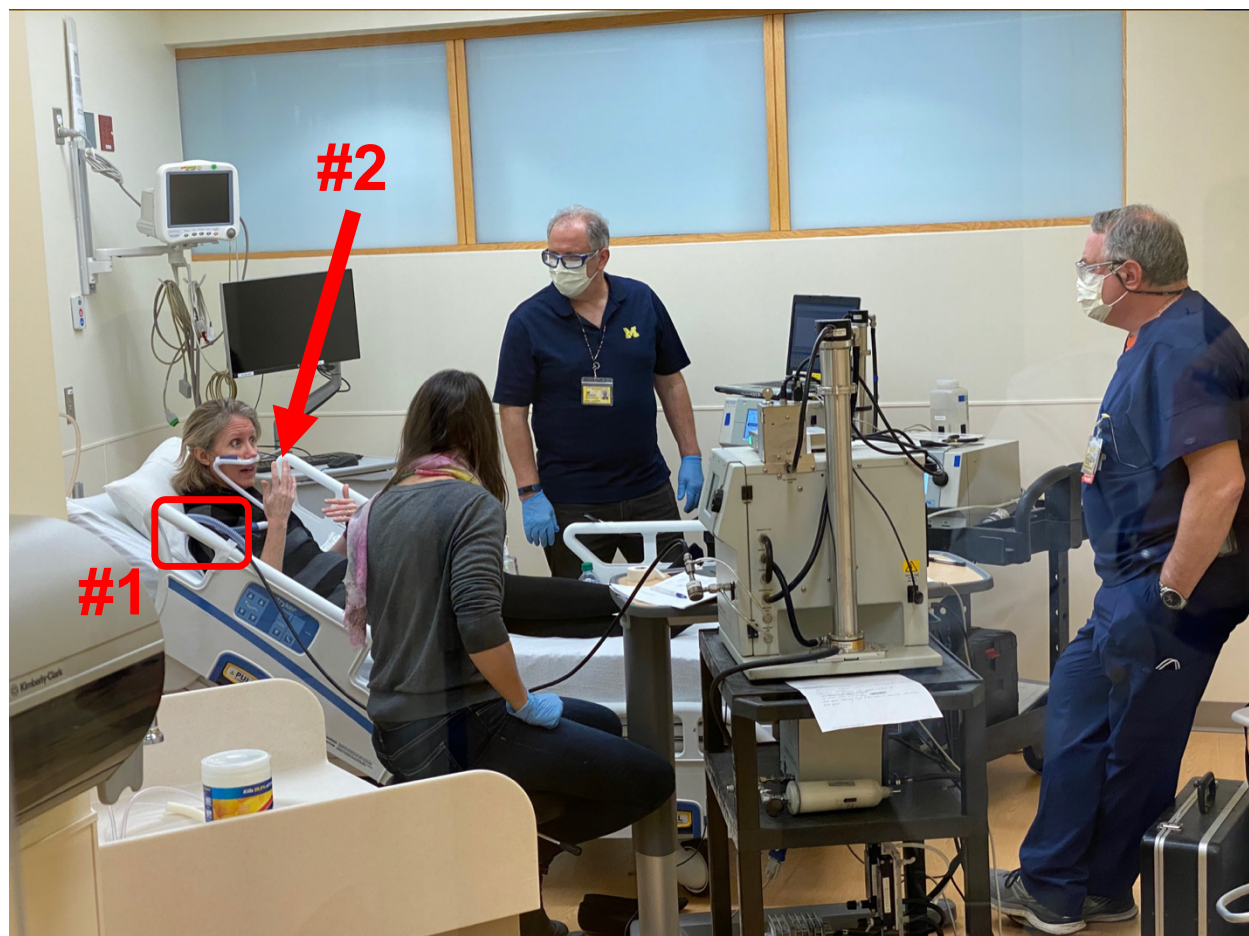

219  
220  
221  
222

223 **Figure 2: Particle mass concentration (SMPS)**  
224

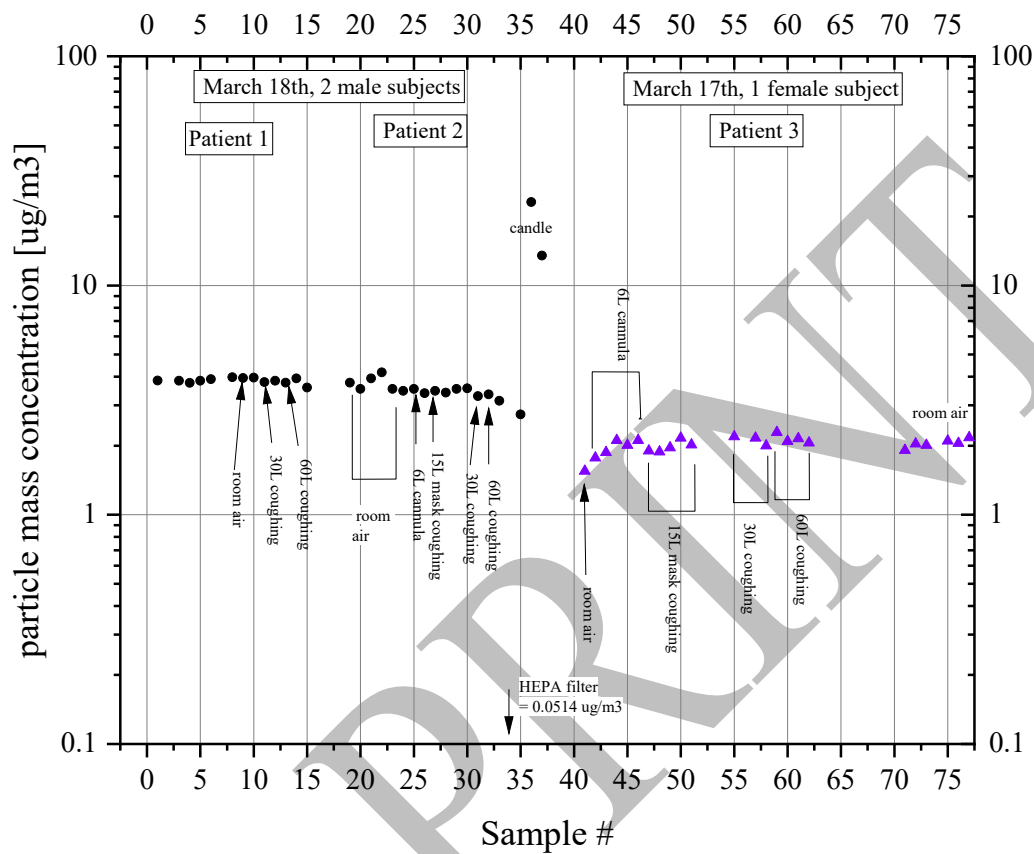

225  
226

227 **Figure 3: Particle number concentration (SMPS)**

228

229

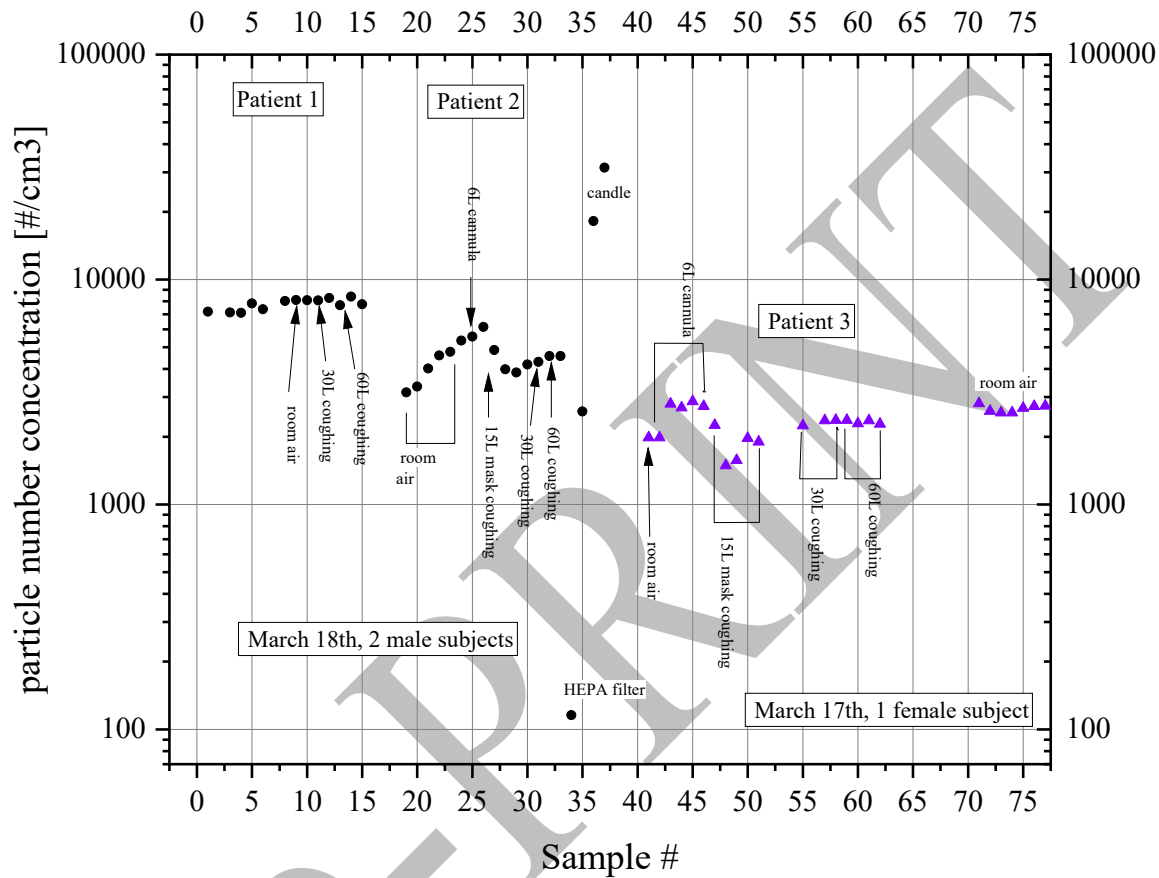

230

231



232  
233  
234  
235  
236

**Figure 4:** Average particle diameter (SMPS).

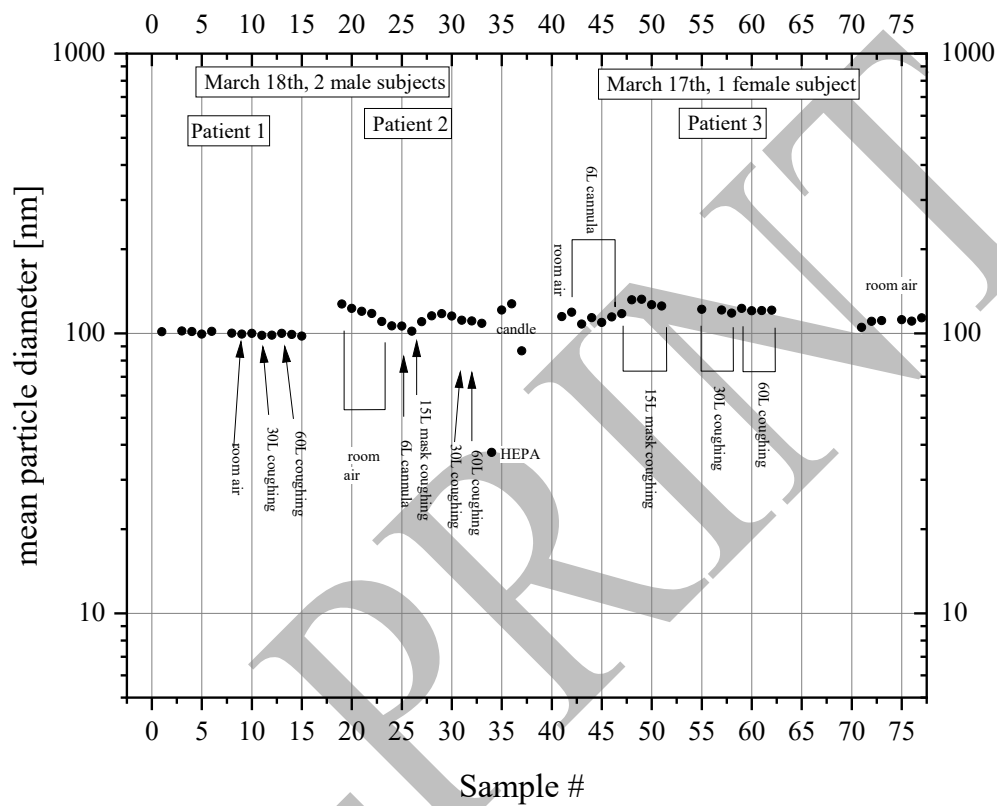

237  
238

239  
240  
241  
242  
243  
244

### Appendix – Data from Broader range Particle Counters for Patients 1, 3, and 4.

**Figure A1:** Particle size distributions (SMPS) of room air and 60 L/min HHFNC

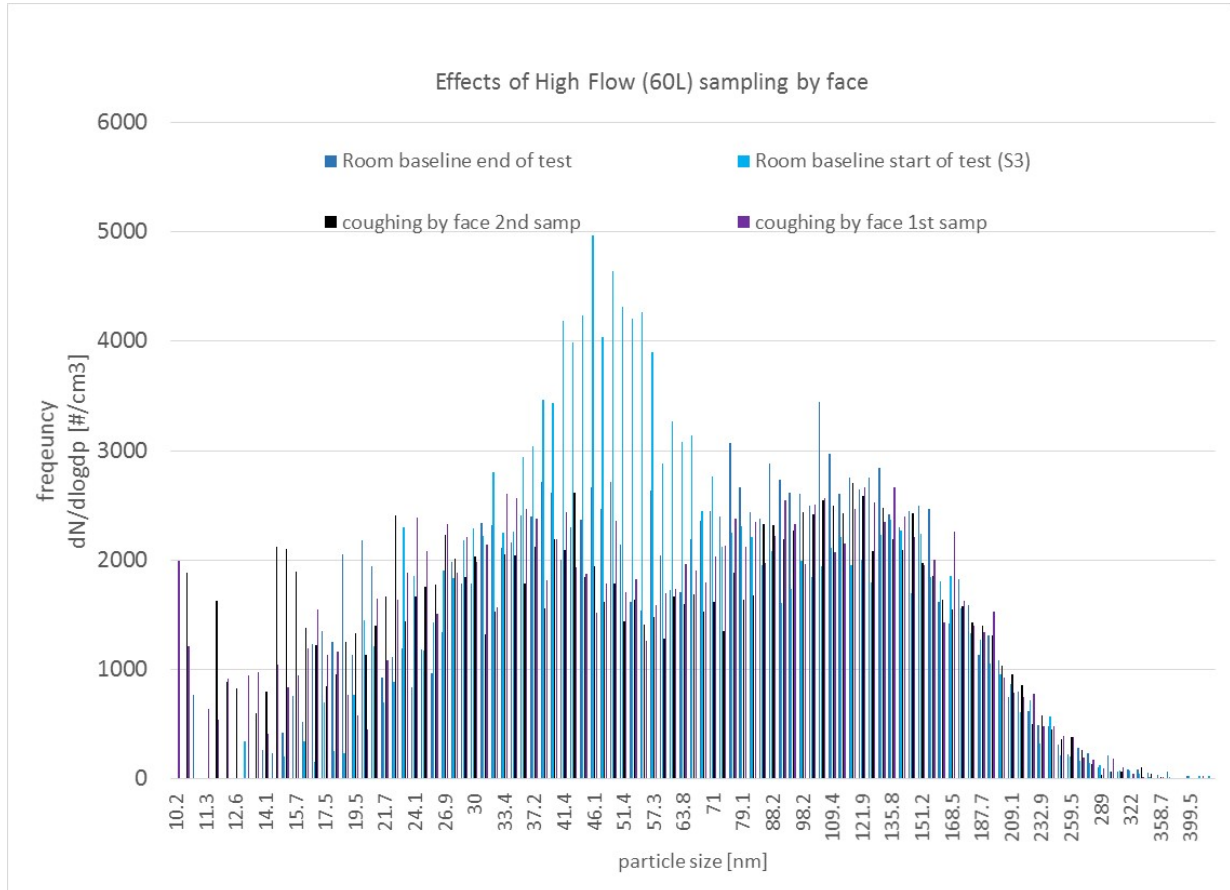

245  
246  
247

**Figure A2:** Particle number concentration (PC) room air and 60 L/min HHFNC

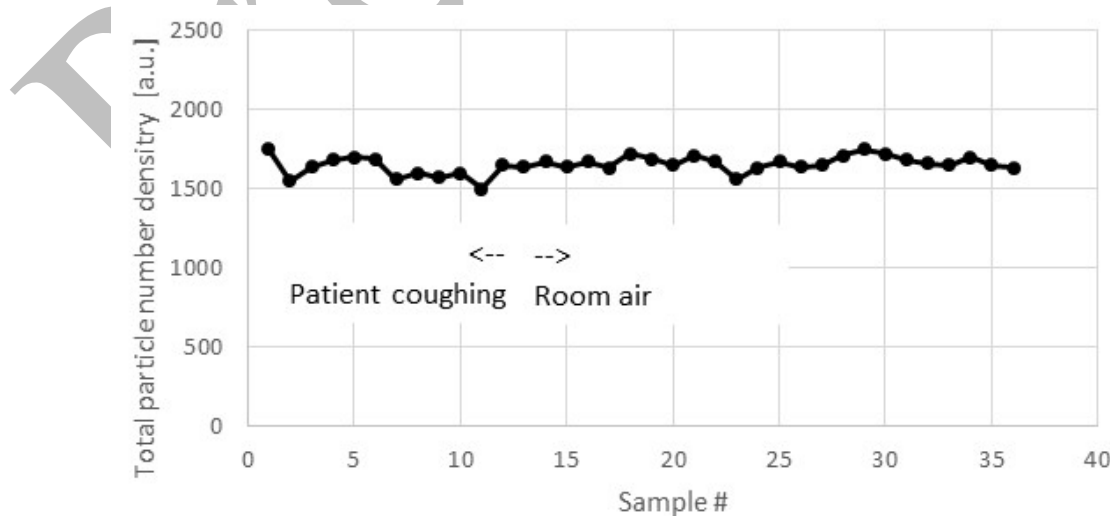

248

249 **Figure A3:** Particle mass concentration (PC) 60 L/min HHFNC and room air.

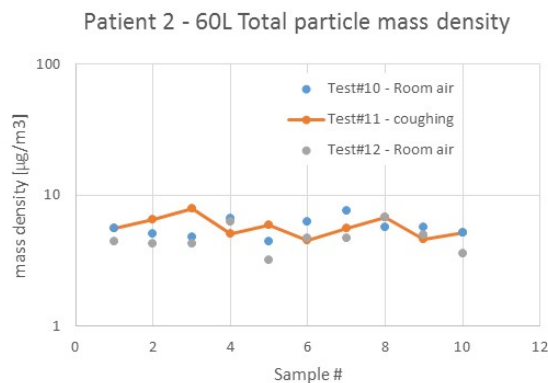

250  
251  
252

**Figure A4:** Particle number concentration (PC) 60 L/min HHFNC and room air.

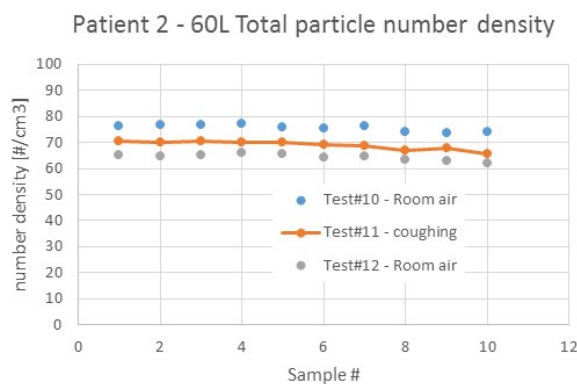

253  
254  
255  
256

(a)

(b)

**Figure A5:** Total number of particles (PC) 60 L/min HHFNC and room air

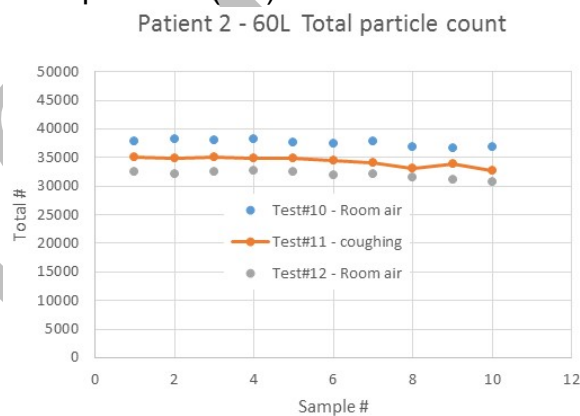

257
